# Supplementary material
Source: publisher site journal article supplement (https://www.spandidos-publications.com/774/downloadSupplementary)
Supplement: Supplementary file 1 [file downloadSupplementary]

Table SIX. GO analysis for mRNAs in hsa\_circ\_0000520-microRNA-mRNA axis.

| ID         | Description                                                                                                         | GeneRatio | P-value    |
|------------|---------------------------------------------------------------------------------------------------------------------|-----------|------------|
| GO:0042826 | Histone deacetylase binding                                                                                         | 20/714    | 1.41E-08   |
| GO:0001047 | Core promoter binding                                                                                               | 21/714    | 2.97E-07   |
| GO:0001228 | Transcriptional activator activity, RNA polymerase II transcription regulatory region sequence-specific DNA binding | 40/714    | 4.69E-07   |
| GO:0001046 | Core promoter sequence-specific DNA binding                                                                         | 15/714    | 2.06E-06   |
| GO:0000982 | Transcription factor activity, RNA polymerase II proximal promoter sequence-specific DNA binding                    | 35/714    | 3.96E-05   |
| GO:0001158 | Enhancer sequence-specific DNA binding                                                                              | 13/714    | 0.00010835 |
| GO:0035035 | Histone acetyltransferase binding                                                                                   | 7/714     | 0.00012774 |
| GO:0000987 | Proximal promoter sequence-specific DNA binding                                                                     | 35/714    | 0.00020548 |
| GO:0001221 | Transcription cofactor binding                                                                                      | 8/714     | 0.00020951 |
| GO:0001227 | Transcriptional repressor activity, RNA polymerase II transcription regulatory region sequence-specific DNA binding | 22/714    | 0.00022204 |
| GO:0003713 | Transcription coactivator activity                                                                                  | 27/714    | 0.00025121 |
| GO:0035326 | Enhancer binding                                                                                                    | 13/714    | 0.00044017 |

GO, Gene Ontology; circ, circular RNA; hsa, Homo sapiens.
